# Supplementary material for: A closed form unwrapping method for a spherical omnidirectional view sensor
Source: Springer Nature journal article supplement (doi:10.1186/1687-5281-2013-5), 2013-01-11

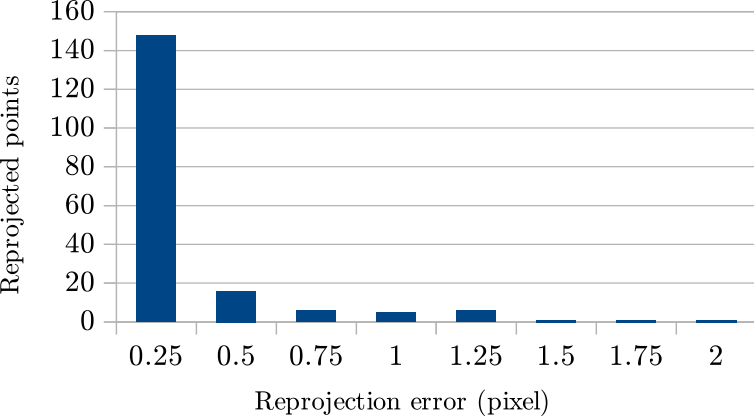

Supplement: 13640_2012_55_MOESM18_ESM.pdf [file 13640_2012_55_MOESM18_ESM.pdf]
